# Supplementary material for: Photothermal treatment of oropharyngeal cancer with carbon-defective silicon carbide
Source: Royal Society of Chemistry journal article supplement (doi:10.1039/d1tb00876e), 2021-01-01
Supplement: d1tb00876e1.pdf [file d1tb00876e1.pdf]

# Photothermal Treatment of Oropharyngeal Cancer with Carbon-Defective Silicon Carbide

Haibin Mu,<sup>a</sup> Haiyang Pang,<sup>b</sup> Ce Zheng,<sup>c</sup> Kaixin Wang,<sup>d</sup> Narisu Hu<sup>\*b</sup> and Bin Zhang<sup>a</sup>,  
<sup>b\*</sup>

---

<sup>a.</sup> *Institute of Hard Tissue Development and Regeneration, The Second Affiliated Hospital of Harbin Medical University, Harbin 150001, Heilongjiang, China.*

<sup>b.</sup> *Oral Implant Center, Second Affiliated Hospital of Harbin Medical University, Harbin 150086, China.*  
*E-mail: [56506075@qq.com](mailto:56506075@qq.com)(N.Hu)*

<sup>c.</sup> *Medical Affairs Department, Harbin Medical University, Harbin 150086, China;*

<sup>d.</sup> *Shanghai Chaowei Nanotechnology Co. Ltd. No.487, Edward, Road, Jiading District, Shanghai, China.*

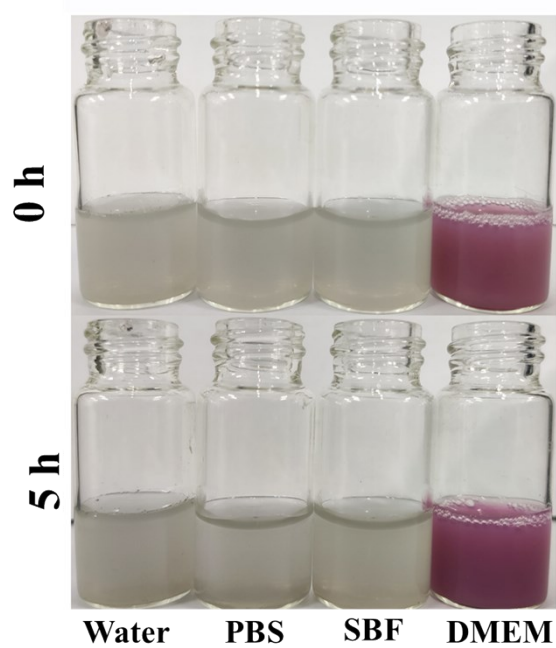

**Figure S1** The photographs of SiC1-x dispersed in different mediums.

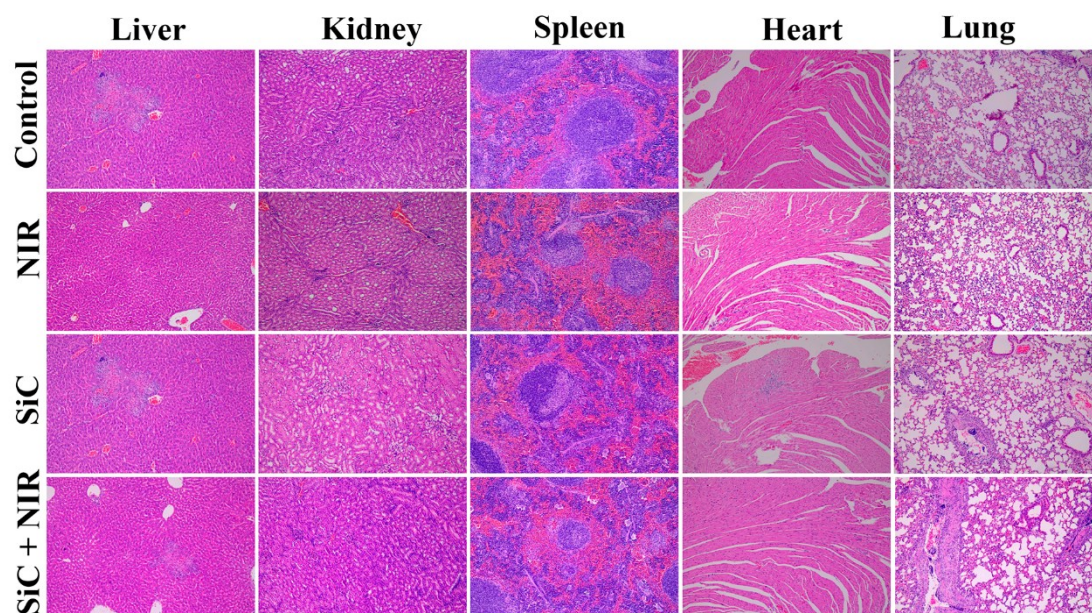

**Figure S2** H&E stain image of major organs

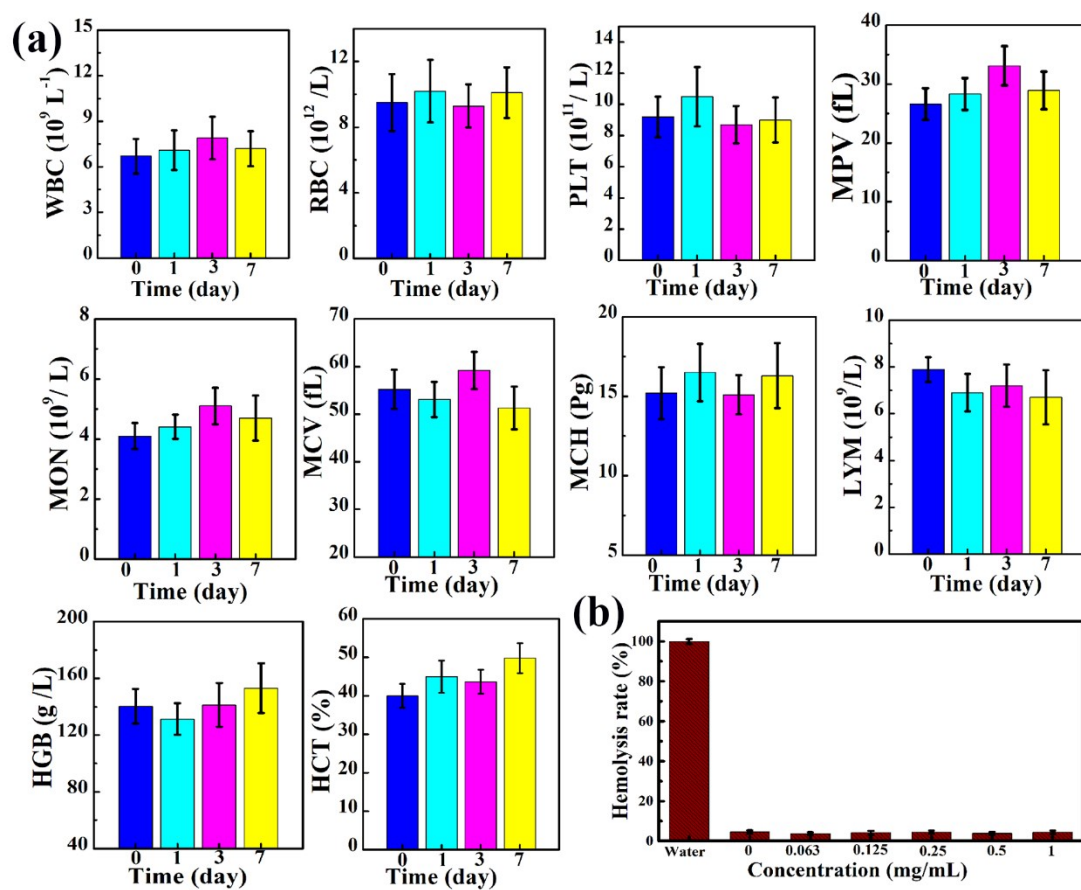

Figure S3 (a) hematological analyses and (b) hemolysis assay

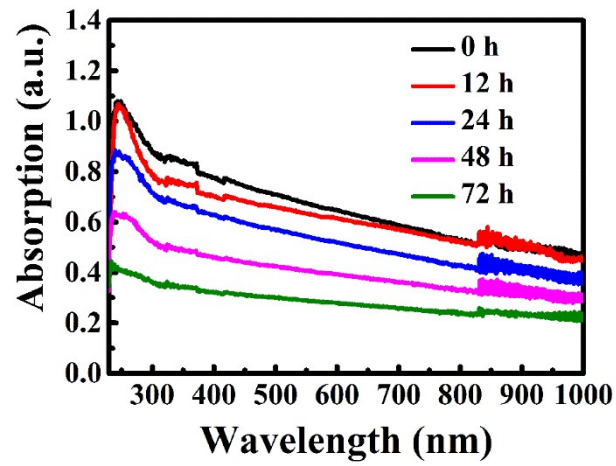

Figure S4 Optical absorbance of  $\text{SiC}_{1-x}$  in SBF solution.

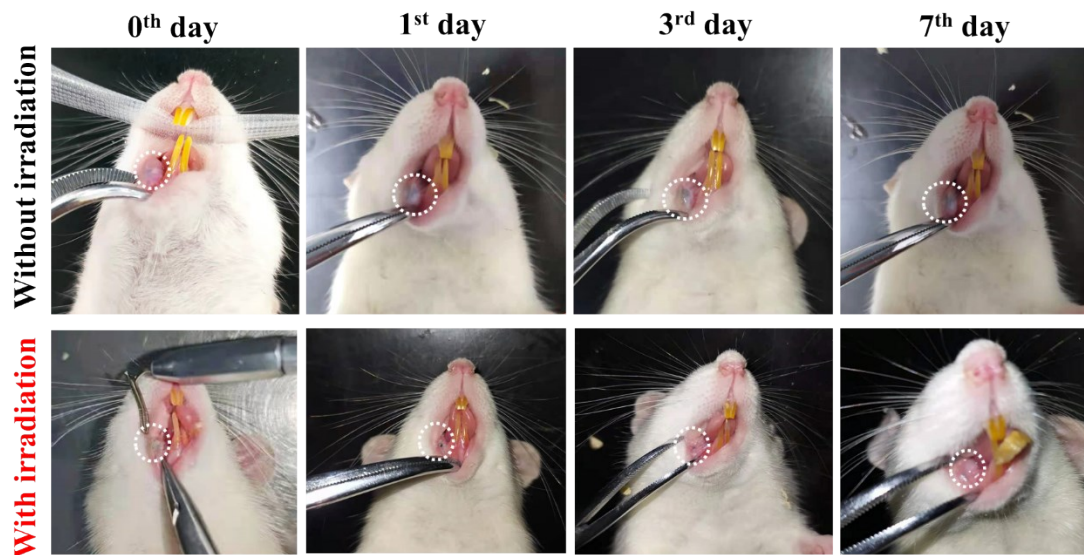

Figure S5 Photographs of mice with and without PTT anti-bacterial treatment
